# Supplementary material for: Preserving the Ephemeral: A Micro-Invasive Study on a Set of Polyurethane Scenic Objects from the 1960s and 1970s
Source: MDPI journal article supplement (doi:10.3390/polym15092111), 2023-04-28
Supplement: s1 [file s1]

## Supplementary Materials

### Preserving the ephemeral: a micro-invasive study on a set of polyurethane scenic objects from the 1960s and 1970s.

Rosa Costantini <sup>1</sup>, Luca Nodari <sup>1\*</sup>, Jacopo La Nasa <sup>2</sup>, Francesca Modugno <sup>2</sup>, Lucia Bonasera <sup>2</sup>, Sara Rago <sup>3</sup>, Alfonso Zoleo <sup>4</sup>, Stefano Legnaioli <sup>5</sup> and Patrizia Tomasin <sup>1</sup>

<sup>1</sup> Institute of Condensed Matter Chemistry and Technologies for Energy, National Research Council, (ICMATE-CNR), Corso Stati Uniti 4, 35127, Padua, Italy; rosa.costantini@icmate.cnr.it; luca.nodari@cnr.it, patrizia.tomasin@cnr.it

<sup>2</sup> Department of Chemistry and Industrial Chemistry, University of Pisa, Via Giuseppe Moruzzi 13, 56124 Pisa, Italy; [jacopo.lanasa@unipi.it](mailto:jacopo.lanasa@unipi.it), francesca.modugno@unipi.it, l.bonasera@studenti.unipi.it

<sup>3</sup> Department of Cultural Heritage: Archaeology and History of Art, Cinema and Music, University of Padova, Piazza Capitaniato 7, 35139 Padova, Italy; sara.rago@studenti.unipd.it

<sup>4</sup> Department of Chemical Sciences, University of Padova, Via Marzolo 1, 35131 Padova, Italy; alfonso.zoleo@unipd.it

<sup>5</sup> Institute of Chemistry of OrganoMetallic Compounds, National Research Council, (ICCOM-CNR), Via Moruzzi 1, 56124, Pisa, Italy; stefano.legnaioli@cnr.it

\* Correspondence: luca.nodari@cnr.it

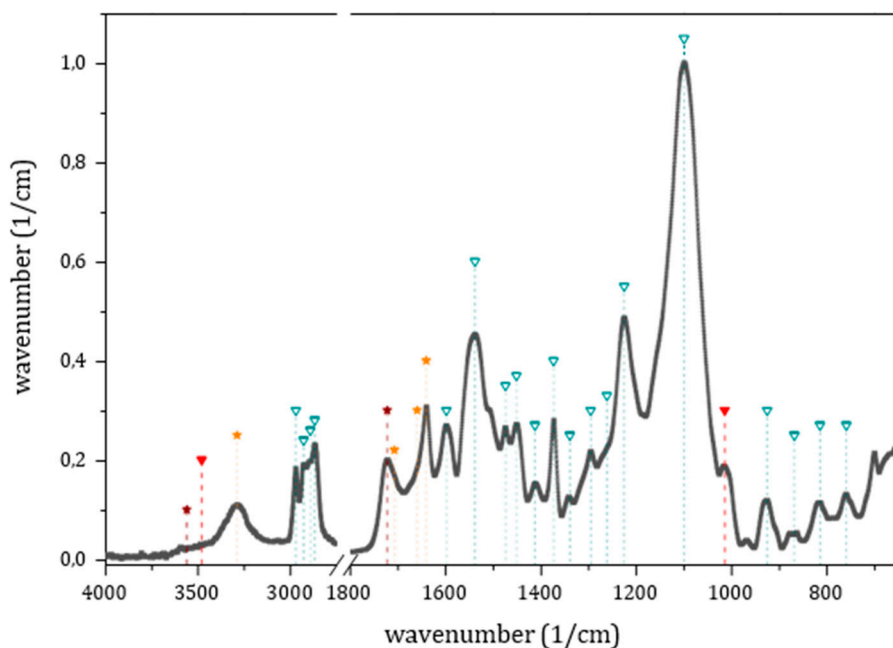

**Figure S1.**  $\mu$ -FTIR spectrum of Reference substrate. Dark cyan triangles stand for the PUR attributions; yellow and dark red stars highlight the signals due to non H-bonded absorptions and H-bonded absorptions respectively; red triangles highlight the signals due to photo-oxidation products.

**Table S1.** PUR-ET tentative of attributions in REF sample according to literature [La Nasa, J.; Biale, G.; Ferriani, B.; Colombini, M.P.; Modugno, F. A pyrolysis approach for characterizing and assessing degradation of polyurethane foam in cultural heritage objects. *Journal of Analytical and Applied Pyrolysis* 2018, 134, 562-572, <https://doi.org/10.1016/j.jaap.2018.08.004>; França de Sá, S.; Ferreira, J.L.; Pombo Cardoso, I.; Macedo, R.; Ramos, A.M. Shedding new light on polyurethane degradation: Assessing foams condition in design objects. *Polymer Degradation and Stability* 2017, 144, 354-365, <https://doi.org/10.1016/j.polymdegradstab.2017.08.028>]. Red lines highlight the absorptions affected by the alteration process and in blue the absorption due the insurgence of new signals, ascribable to the R-OH formation.

| Position     | Attribution                                | Position   | Attribution                        |
|--------------|--------------------------------------------|------------|------------------------------------|
| 3561±4; b, w | v(N-H) non H-bonded                        | 1452±4; m  | δ <sub>a</sub> (C-H <sub>3</sub> ) |
| 3480±4; sh   | v(O-H) H-bonded                            | 1413±4; w  | Isocyanurate ring                  |
| 3289±4; m    | v(N-H) H-bonded                            | 1374±4; m  | δ <sub>s</sub> (C-H <sub>3</sub> ) |
| 3067±4; vw   | v(C-H) in benzene ring                     | 1340±4; w  | ω(C-H <sub>2</sub> )               |
| 2971±4, s    | v <sub>a</sub> (C-H <sub>3</sub> )         | 1296±4; w  | v(C-N)                             |
| 2929±4, s    | v <sub>a</sub> (C-H <sub>2</sub> )         | 1262±4; sh | v(O=C-N-H)                         |
| 2893±4, s    | v(C-H)                                     | 1226±4; s  | v(C-N)                             |
| 2869±4, s    | v <sub>s</sub> (C-H <sub>3</sub> )         | 1100±4; vs | v <sub>s</sub> (C-O-C)             |
| 1723±4; m    | v(C=O) urethane, free                      | 1015±4; w  | v(C-O-H)                           |
| 1708±4; sh   | v(C=O) urethane, loosely H-bonded          | 926±4; w   | ρ(C-H <sub>3</sub> )               |
| 1660±4; sh   | v(C=O) monodentate urea, disordered H-bond | 869±4; w   | ω(C-H) benzene ring                |
| 1643±4; m    | v(C=O) urea H-bonded                       | 815±4; w   | ω(C-H) benzene ring                |
| 1599±4; m    | v(C-H) in benzene rings                    | 760±4; w   | ω(C-H) benzene ring                |
| 1535±4; s    | δ(O=C-N-H)                                 | 702±4; w   | δ(C-H) benzene ring                |
| 1475±4; m    | δ(C-H <sub>2</sub> )                       |            |                                    |

**Table S2.** Compounds identified by Py(cryo)-GC/MS in the samples from the different artworks.

| Nº | Peak identification                        | Main ions (m/z)                             |
|----|--------------------------------------------|---------------------------------------------|
| 1  | Acrolein                                   | 67, 56, 37, 29                              |
| 2  | Isoprene                                   | 68, 67, 53                                  |
| 3  | Propanal                                   | 58, 57                                      |
| 4  | Toluene                                    | 92, 91, 65, 63                              |
| 5  | Ethyl isothiocyanate                       | 87, 72, 59                                  |
| 6  | Ethylbenzene                               | 106, 91, 77, 65                             |
| 7  | 1-isopropoxy propan-2-one                  | 63, 59, 58                                  |
| 8  | 1,4-pentadiene                             | 67, 53                                      |
| 9  | 2-ethyl-1-hexene                           | 112, 70, 55                                 |
| 10 | Styrene                                    | 104, 103, 78                                |
| 11 | 2-methylstyrene                            | 118, 117, 103, 91, 78, 63                   |
| 12 | 2-methylene-4,6-diphenyl hexanitrile       | 128, 117, 91, 77, 65                        |
| 13 | 4,6-diphenylept-6-enitrile                 | 144, 118, 115, 91, 77                       |
| 14 | 2-phenylethyl-4-phenylpent-4-enitrile      | 170, 156, 142, 118, 115, 105, 91, 77        |
| 15 | Toluene diisocyanate (2,4 and 2,6 isomers) | 174, 145, 132, 118, 91, 76                  |
| 16 | Tripropylene glycol                        | 103, 59                                     |
| 17 | Dipropylene glycol                         | 73, 59, 51                                  |
| 18 | Erucamide                                  | 126, 112, 97, 62, 59                        |
| 19 | Squalene                                   | 137, 121, 95, 81, 69                        |
| 20 | Oleic acid                                 | 111, 97, 83, 69, 55                         |
| 21 | Cholesterol                                | 329, 129, 105, 95, 81                       |
| 22 | Diethyl phthalate                          | 177, 149, 121, 105, 93, 76, 75              |
| 23 | 4-methyl-3-hexanol                         | 87, 69, 59                                  |
| 24 | 2-ethylhexanol                             | 70, 57, 55                                  |
| 25 | Bis(2-ethylhexyl) phthalate (DEHP)         | 279, 167, 149, 113, 71, 57                  |
| 26 | Isobutyl methacrylate (iBMA)               | 87, 69, 56                                  |
| 27 | Chloroprene                                | 90, 88, 62, 53                              |
| 28 | 1-chloro-4-(1-chlorovinyl)cyclohexene      | 176, 141, 105, 90, 88, 65                   |
| 29 | Unidentified                               | 239, 193, 179, 165, 152, 115, 91, 79        |
| 30 | Unidentified                               | 254, 239, 191, 178, 165, 152, 141, 128, 115 |
| 31 | 3-methylphenol                             | 108, 107, 90, 79, 77, 63                    |
| 32 | 4-tert-butylphenol                         | 150, 135, 107, 95, 91, 77, 65               |
| 33 | 4-tert-butyl-2-methylphenol                | 164, 149, 121, 91, 77                       |
| 34 | 2,4-dimethyl-6-tert-butylphenol            | 178, 163, 135, 91, 77                       |
| 35 | 5-methyl-2,4-diisopropylphenol             | 192, 177, 135, 115, 91, 77                  |
| 36 | Benzene                                    | 78, 74, 51                                  |
| 37 | Acetic acid                                | 60                                          |
| 38 | Xylene and isomers                         | 106, 105, 91, 77                            |
| 39 | 1-heptene                                  | 98, 70, 56                                  |
| 40 | 1-decene                                   | 140, 111, 97, 83, 70, 55                    |
| 41 | 1-undecene                                 | 154, 126, 111, 97, 83, 70, 55               |
| 42 | 2-methyl-1-undecene                        | 168, 140, 83, 69, 56                        |
| 43 | 1-tetradecene                              | 196, 125, 111, 97, 83, 70, 55               |
| 44 | 1-heptadecene                              | 238, 125, 111, 97, 83, 69, 55               |
| 45 | 1-octadecene                               | 252, 125, 111, 97, 83, 69, 55               |
| 46 | 1-nonadecene                               | 266, 139, 125, 11, 97, 83, 69, 55           |
| 47 | 1-eicosene                                 | 280, 139, 125, 111, 96, 83, 69, 57          |

**Table S3.** Binder's identification on selected artworks by  $\mu$ -FTIR and \* by Py(cryo)-GC/MS

| Artworks                       | Sample                                   | Polyvinyl acetate | Acryl-based |
|--------------------------------|------------------------------------------|-------------------|-------------|
| <i>Rainbow</i>                 | <i>R_1, R_2, R_3, R_4, R_5, R_6, R_7</i> | ✓                 |             |
| <i>Scarf</i>                   | <i>SCA_2, SCA_3, SCA_4</i>               | ✓                 |             |
| <i>Arrow</i>                   | <i>AR_3</i>                              | ✓ *               |             |
| <i>Big Vibrating Character</i> | <i>BVC_2, BVC_3</i>                      | ✓ *               |             |
| <i>Glove</i>                   | <i>GL-1</i>                              | ✓                 |             |
|                                | <i>GL-2</i>                              |                   | ✓           |
| <i>Tree</i>                    | <i>TR_1</i>                              | ✓                 |             |
| <i>Envelope</i>                | <i>ENV_2</i>                             |                   | ✓ *         |

**Table S4.** Pigments identified Raman spectroscopy measurements. Vs: very strong, s: strong, m: medium.

| Sample | Colour      | Raman modes (cm <sup>-1</sup> )                                                                                                  | Pigment                                                                                               |
|--------|-------------|----------------------------------------------------------------------------------------------------------------------------------|-------------------------------------------------------------------------------------------------------|
| R_1    | Blue        | 257, 547(vs), 805, 1096(m), 1355, 1643, 1801, 1927                                                                               | Ultramarine<br>(Na <sub>8-10</sub> Al <sub>6</sub> Si <sub>6</sub> O <sub>24</sub> S <sub>2-4</sub> ) |
| R_2    | Indigo      | 258, 548(vs), 807, 1096(m), 1354, 1644                                                                                           | Ultramarine<br>(Na <sub>8-10</sub> Al <sub>6</sub> Si <sub>6</sub> O <sub>24</sub> S <sub>2-4</sub> ) |
| R_3    | Green       | 200, 292, 640, 683(vs), 705(m), 739(s), 777(s), 817, 976(m), 1080(m), 1213(vs), 1281(s), 1336(s), 1388, 1444(s), 1537(vs)        | Phthalocyanine                                                                                        |
| R_4    | Yellow      | 342, 444, 618, 1065, 1135, 1247, 1274(vs), 1315(vs), 1389(s), 1478, 1508, 1548(m), 1591(vs)                                      | PY16 C.I. 20040,<br>(Disazo pigment,<br>Bisacetoacetarylide)                                          |
| R_5    | Orange      | 263, 342, 456, 623, 918, 985(s), 1141, 1253(s), 1291(m), 1334(m), 1400(s), 1596(vs)                                              | PY83 C.I. 21108,<br>(Disazo pigment,<br>Diarylide)                                                    |
| R_6    | Red         | 467, 527(m), 725, 746, 812, 957, 1060(m), 1110(m), 1161(m), 1230(s), 1282(s), 1315, 1359(vs), 1484(s), 1552(m), 1579(vs)         | PR112 C.I. 12370,<br>(Monoazo pigment,<br>Naphthol AS)                                                |
| R_7    | Dark orange | 345(s), 442, 454, 527(m), 615, 662, 680(s), 725, 746, 811, 918, 962(s), 1060(s), 1108(s), 1160(vs), 1254(vs)                     | PY83 C.I. 21108,<br>(Disazo pigment,<br>Diarylide)                                                    |
|        |             | 1281(vs), 1333(m), 1355(vs), 1374(s), 1390(vs), 1460s, 1484(s), 1552(s), 1596(vs)                                                | PR112 C.I. 12370,<br>(Monoazo pigment,<br>Naphthol AS)                                                |
| AR_2   | Blue        | 2145, 1187, 1351                                                                                                                 | Prussian blue<br>(Fe <sub>4</sub> [Fe(CN) <sub>6</sub> ] <sub>3</sub> )                               |
| AR_3   | Red         | 338(m), 567(m), 666, 965, 1045(m), 1110, 1157(m), 1235, 1257, 1280(m), 1364(vs), 1423(m), 1448, 1490(m), 1553(m), 1583(vs), 1606 | PR9 C.I. 12460,<br>(Monoazo pigment,<br>Naphthol AS)                                                  |
| BVC_2  | Yellow      | 460(m), 785, 999, 1137(m), 1178, 1192, 1215(m), 1254(m), 1310(s), 1322(m), 1386(m), 1485(s), 1533, 1621(s), 1670                 | PY1 C.I. 11680,<br>(Monoazo pigment,<br>acetoacetic arylide)                                          |
| GL_1   | Red         | 338(m), 567(m), 666, 965, 1045(m), 1110, 1157(m), 1235, 1257, 1280(m), 1364(vs), 1423(m), 1448, 1490(m), 1553(m), 1583(vs), 1606 | PR9 C.I. 12460,<br>(Monoazo pigment,<br>Naphthol AS)                                                  |
| GL_2   | Blue        | 548(vs), 802, 1096s, 1359, 1647(m)                                                                                               | Ultramarine<br>(Na <sub>8-10</sub> Al <sub>6</sub> Si <sub>6</sub> O <sub>24</sub> S <sub>2-4</sub> ) |
| TR_1   | Red         | 345(m), 706, 752, 782, 865(m), 926, 1102(m), 1358(m), 1614                                                                       | PR122/PV19<br>(Polycyclic pigment,<br>Quinacridone)                                                   |
| ENV_2  | Blue        | 548(vs), 802, 1096(s), 1359, 1647(m)                                                                                             | Ultramarine<br>(Na <sub>8-10</sub> Al <sub>6</sub> Si <sub>6</sub> O <sub>24</sub> S <sub>2-4</sub> ) |

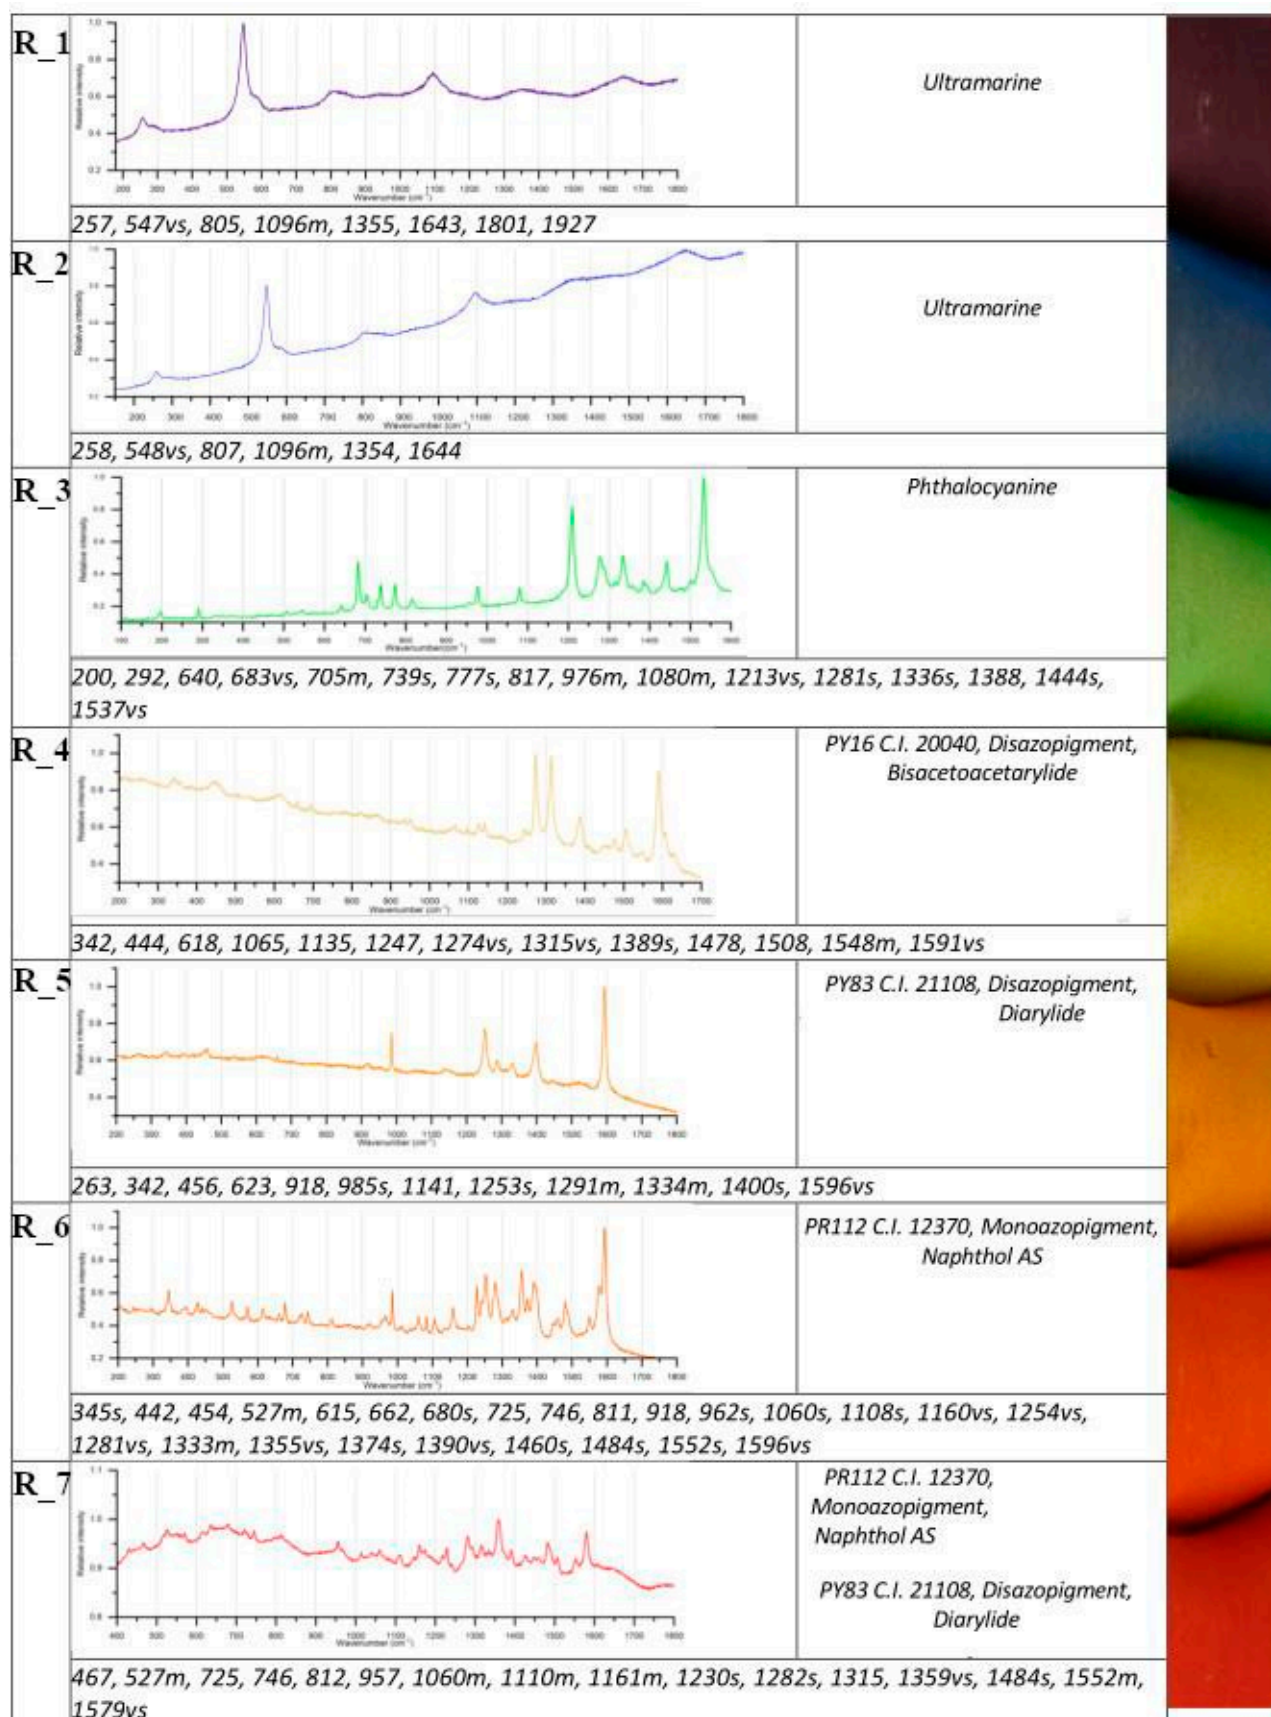

**Figure S2.**  $\mu$ -Raman spectra acquired on the different color of Rainbow. The spectra are presented together with the identifying peaks.



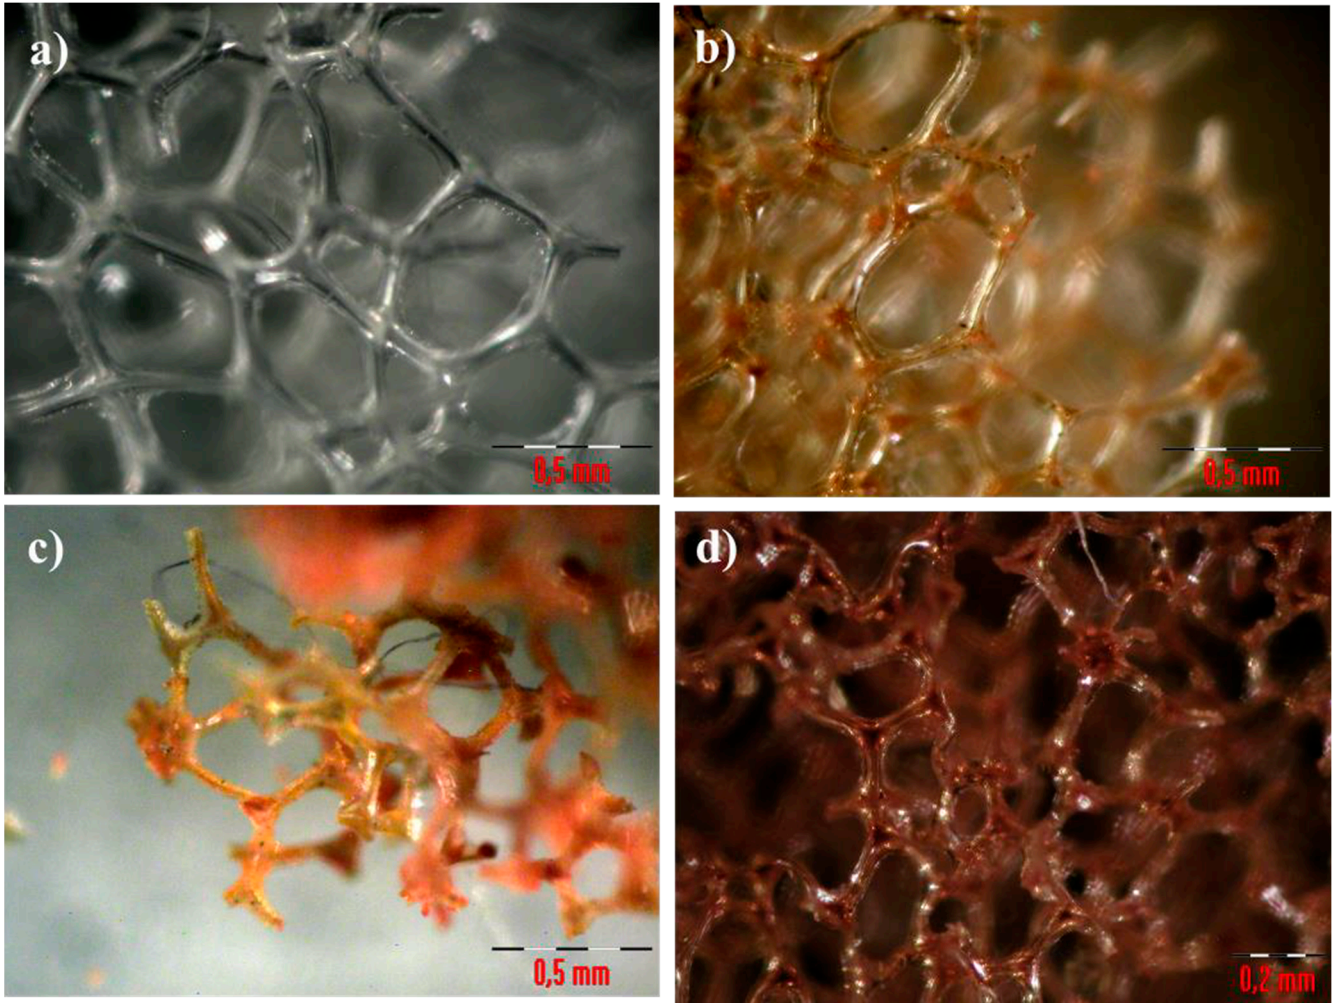

**Figure S3.** OM images acquired at 63X on: a) REF, b) Big vibrating character, c) Rainbow and d) Parachutist.

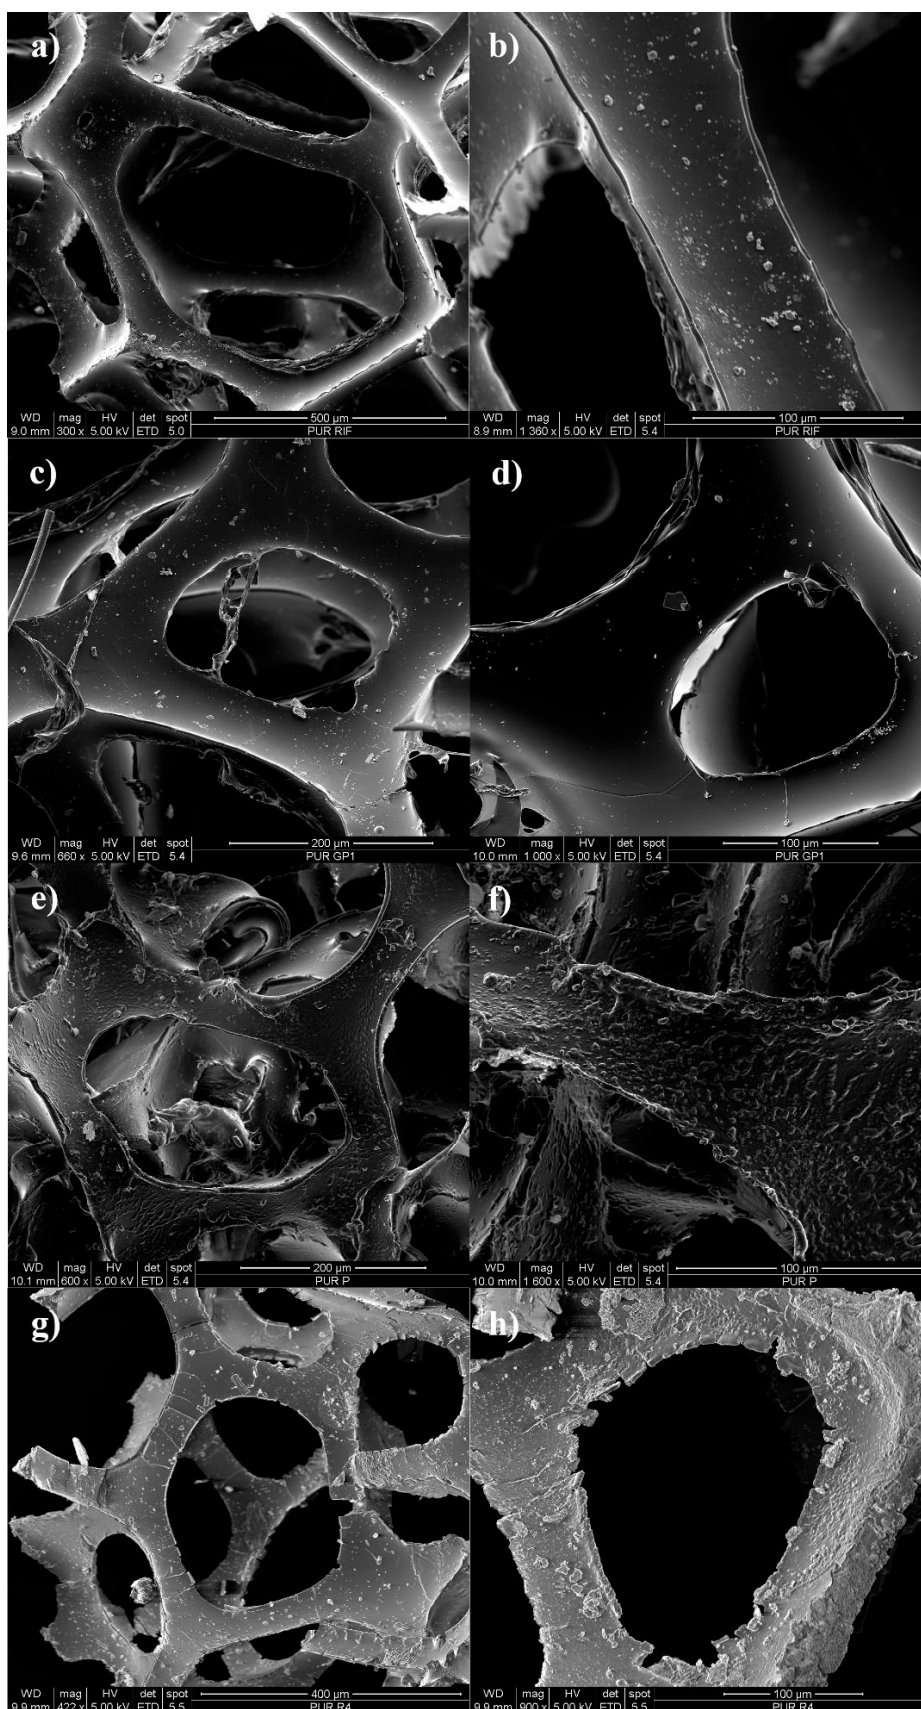

**Figure S4.** Secondary electrons SEM images of samples from: REF (a-b); *Big Vibrating Character* (c-d); *Parachutist* (e-f); *Rainbow* (g-h)

**Table S5.** average cell strut evaluated by the analysis of SEM images. The average cell strut was calculated over at least 10 measurements on different cells. We assume an error of 5% of the average value.

| Sample | Author        | Period | Length ( $\mu\text{m}$ ) |
|--------|---------------|--------|--------------------------|
| REF    | De Incontrera | 2020   | 71 $\pm$ 4               |
| Env_1  | De Incontrera | 2020   | 67 $\pm$ 4               |
| AR_1   | Cogno         | 1970s  | 63 $\pm$ 3               |
| BVC_1  | Cogno         | 1970s  | 62 $\pm$ 3               |
| SCA_1  | Cogno         | 1970s  | 62 $\pm$ 3               |
| PAR_1  | Reina         | 1960s  | 55 $\pm$ 3               |
| R_4    | Reina         | 1960s  | 55 $\pm$ 3               |
